# Supplementary material
Source: publisher figshare collection journal article supplement (https://acs.figshare.com/ndownloader/files/3729043)
Supplement: Supplementary file 1 [file 3729043]

Supporting information

# Structure, Luminescence and Application of a Robust Carbide Nitride Blue Phosphor ( $\text{Al}_{1-x}\text{Si}_x\text{C}_x\text{N}_{1-x}:\text{Eu}^{2+}$ ) for Near UV-LED Driven Solid State Lighting

Le Wang,<sup>†</sup> Xiaojun Wang,<sup>‡</sup> Takashi Takeda,<sup>‡</sup> Naoto Hirosaki,<sup>‡</sup> Yi-ting Tsai,<sup>§</sup> Ru-Shi Liu,<sup>§,§</sup> Rong-Jun Xie<sup>‡,⊥,\*</sup>

<sup>†</sup>College of Optical and Electronic Technology, China Jiliang University, Hangzhou, Zhejiang 310018, China

<sup>‡</sup>Sialon Group, Sialon Unit, Materials for Environment and Energy Division, National Institute for Materials Science (NIMS), Namiki 1-1, Tsukuba, Ibaraki 305-0044, Japan

<sup>§</sup>Department of Chemistry, National Taiwan University, Taipei 106, Taiwan

<sup>§</sup> Department of Mechanical Engineering and Graduate Institute of Manufacturing Technology, National Taipei University of Technology, Taipei 106, Taiwan

<sup>⊥</sup>College of Materials, Xiamen University, No. 422 Siming-nan Road, Xiamen, Fujian 361005, China

\* Xie.Rong-Jun@nims.go.jp

## EDS mapping

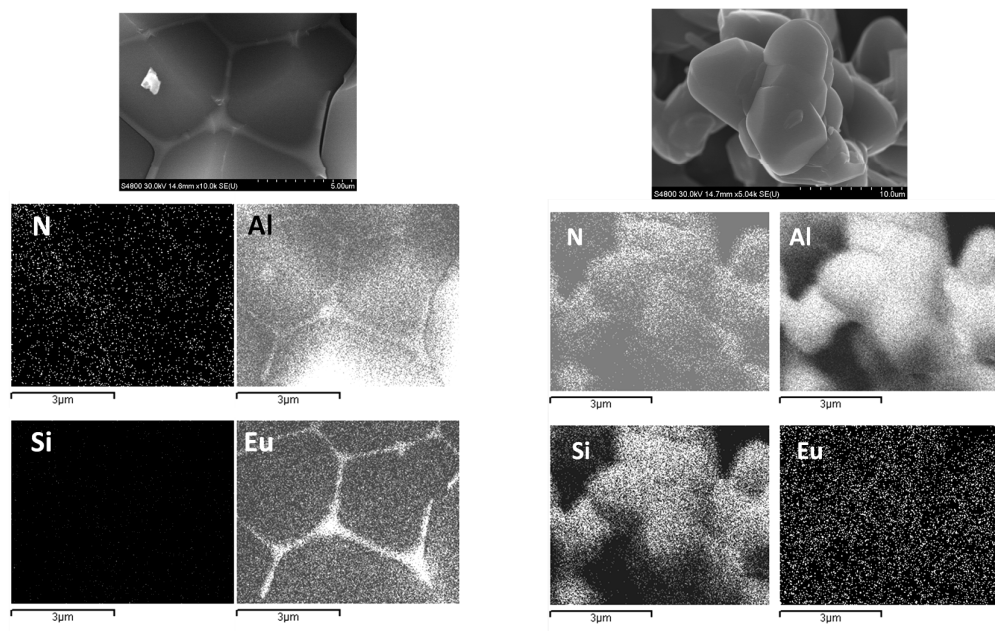

Fig. S1

EDS mapping of  $\text{Al}_{1-x}\text{Si}_x\text{C}_x\text{N}_{1-x}:\text{Eu}_y$  samples with  $x = 0$  (left) and  $x = 0.06$  (right)

## Excitation spectra

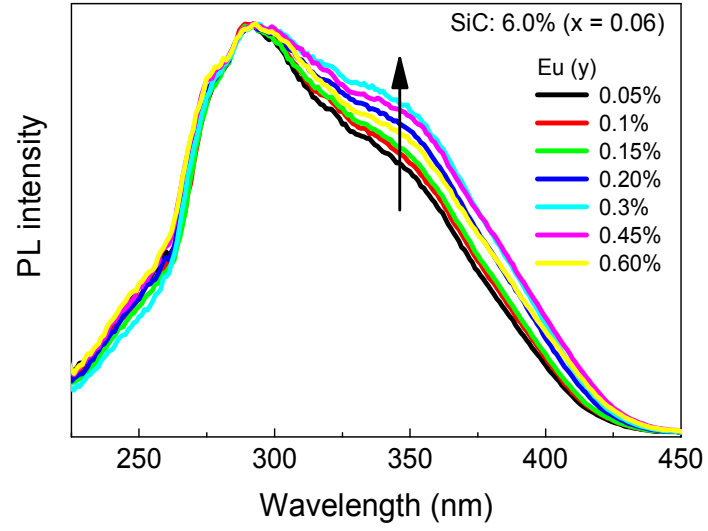

Fig. S2

Excitation spectra of  $\text{Al}_{1-x}\text{Si}_x\text{C}_x\text{N}_{1-x}:\text{Eu}_y$  samples ( $x = 0.06$ ) with varying  $\text{Eu}^{2+}$  concentrations, only showing the enhanced right wing of the spectra.

## Emission spectra

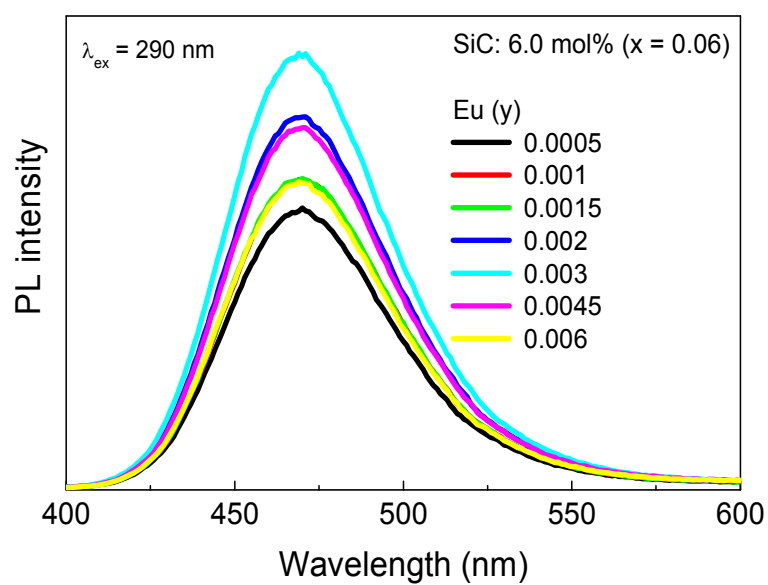

Fig. S3

Emission spectra of  $\text{Al}_{1-x}\text{Si}_x\text{C}_x\text{N}_{1-x}:\text{Eu}_y$  samples ( $x = 0.06$ ) with varying  $\text{Eu}^{2+}$  concentrations, indicating no shifts in peak emission as the  $\text{Eu}^{2+}$  concentration increases.

## Concentration quenching

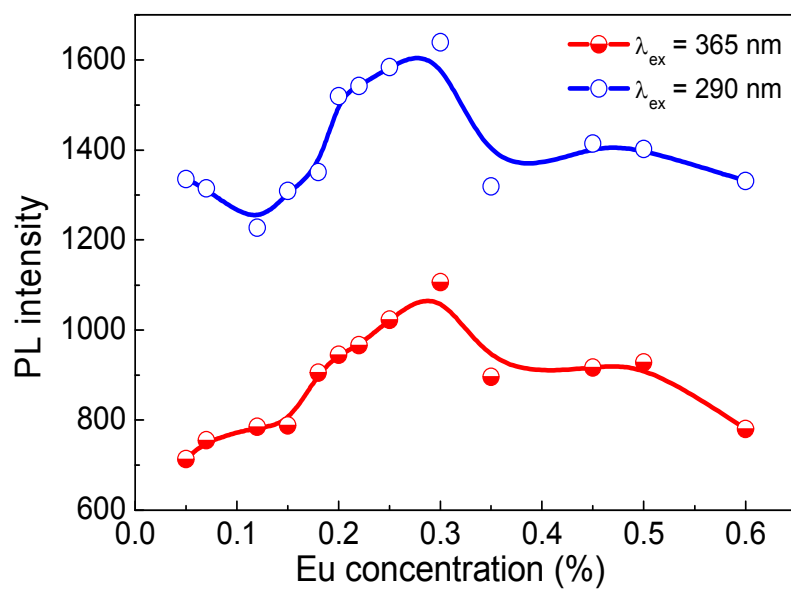

Fig. S4

Concentration quenching of  $\text{Al}_{1-x}\text{Si}_x\text{C}_x\text{N}_{1-x}:\text{Eu}_y$  samples ( $x = 0.06$ ), showing the optimal concentration of  $y = 0.003$  (0.3 mol%).

## Decay time

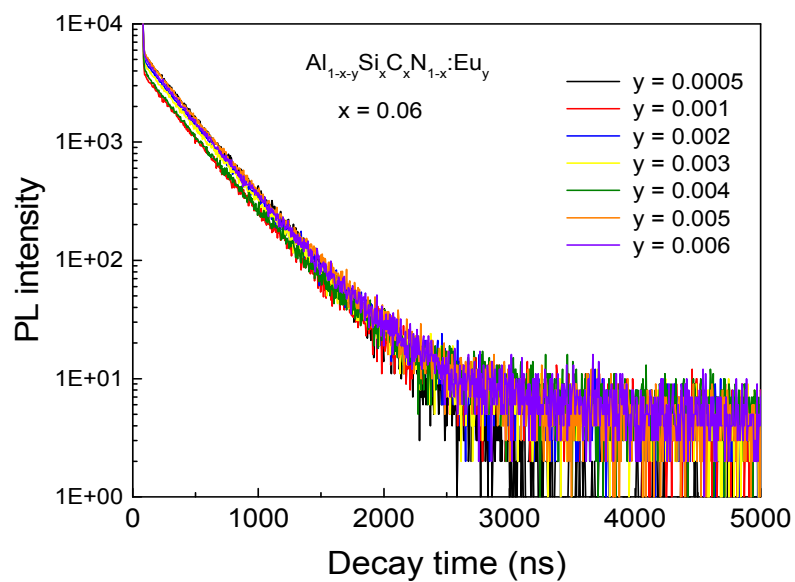

Fig. S5

Decay curves of  $\text{Al}_{1-x}\text{Si}_x\text{C}_x\text{N}_{1-x}:\text{Eu}_y$  samples ( $x = 0.06$ ) with varying  $\text{Eu}^{2+}$  concentrations, showing a single exponential decay of luminescence intensity.
